# Supplementary material for: Phylogenomic Insights into the Phylogeography of Halophila baillonii Asch.
Source: MDPI journal article supplement (doi:10.3390/d15010111), 2023-01-13

Supplemental Figure S5. Phylogenetic tree of the chloroplast loci for *H. baillonii* and *H. engelmannii* only.

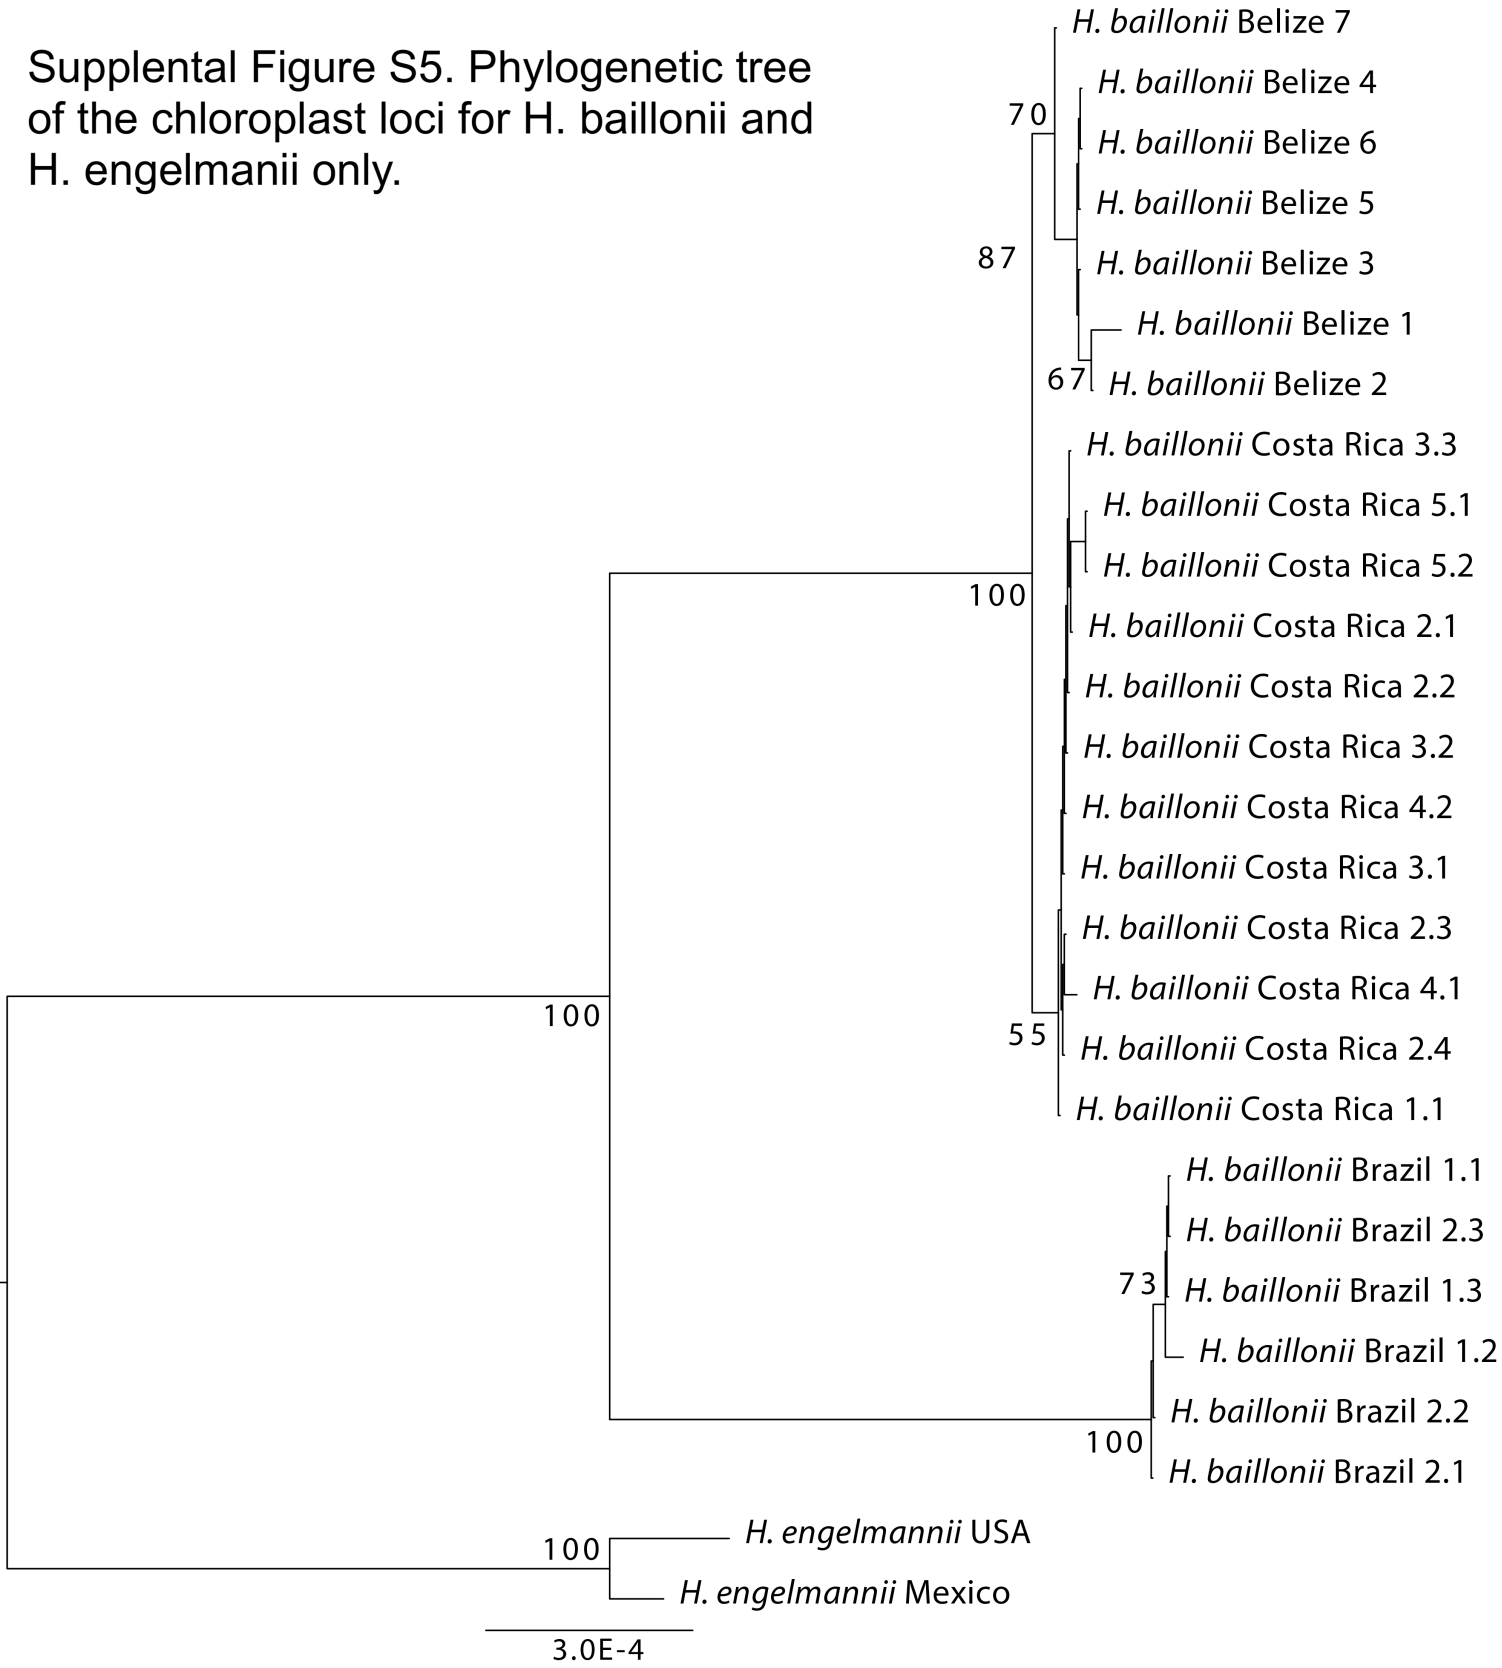

Supplement: s1 [file s1]
