# Supplementary figures and images for: Phylogenomic Insights into the Phylogeography of Halophila baillonii Asch.
Source: MDPI journal article supplement (doi:10.3390/d15010111), 2023-01-13

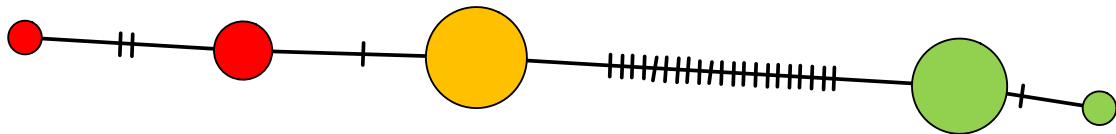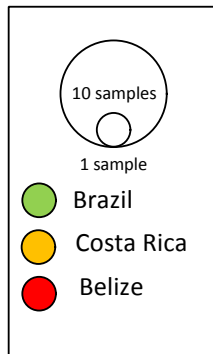

Supplemental Figure S6. Haplotype network of *Halophila baillonii* masked alignment.

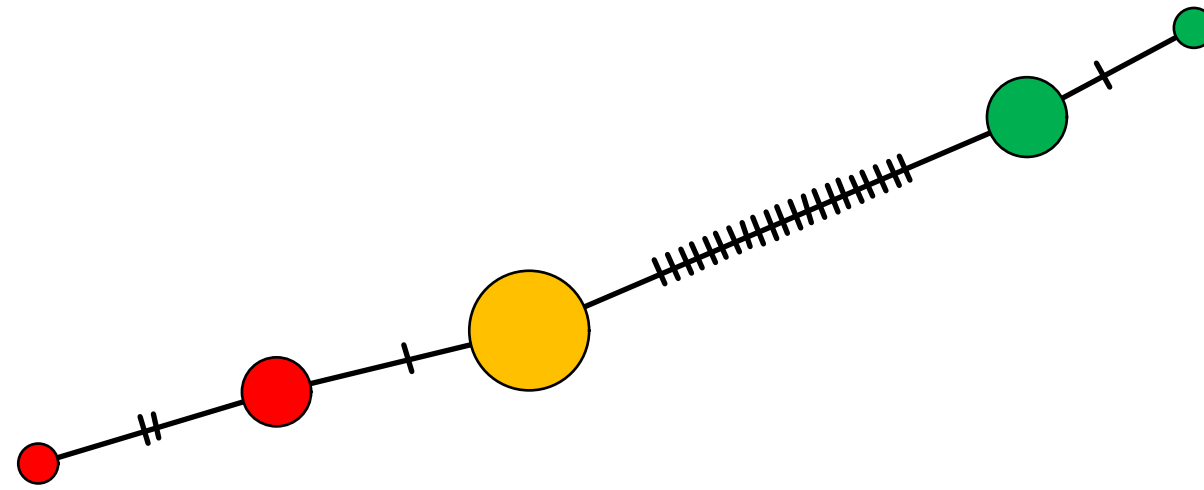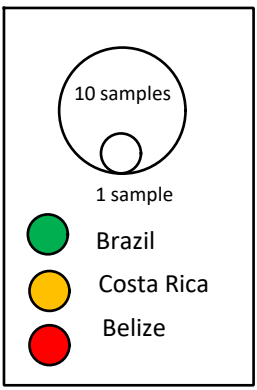

Supplement: s1 [file s1]
